# Supplementary material for: Hepatic NAPE-PLD Is a Key Regulator of Liver Lipid Metabolism
Source: Cells. 2020 May 18;9(5):1247. doi: 10.3390/cells9051247 (PMC7291298; doi:10.3390/cells9051247)
Supplement: Supplementary file 1 [file cells-09-01247-s001.pdf]

***In situ* hybridization.** This technique was performed in collaboration with Creative Bioarray (Shirley, New York, USA). Paraffin-embedded liver tissue sections were pretreated by immersing the slides in diverse xylene, ethanol baths (100%, 85%, 75%) and in pre-warmed 3% H<sub>2</sub>O<sub>2</sub>. Sections were next pretreated for the protease by being immersed successively in 0.2M HCl, 0.5% Triton X-100 in PBS, 20 µg/mL Proteinase K, 4% PFA baths and finally dehydrated. For the hybridization, *Napepld* probe solution (RNA ISH Probe from Creative Bioarray labelled with digoxin) was added to the hybridization buffer (1/50). Sections were incubated with 200µL of this buffer in a humidified chamber, in the dark at 37 °C for 20 hours. After washing, sections were incubated for 1 hour at 37 °C with Horseradish Peroxidase (HRP)-digoxin conjugate solution. Detection was mediated by diaminobenzidine (DAB). Slides were dehydrated and covered. Bright field images were acquired using a Nikon 80I microscope equipped with a 40× objective.

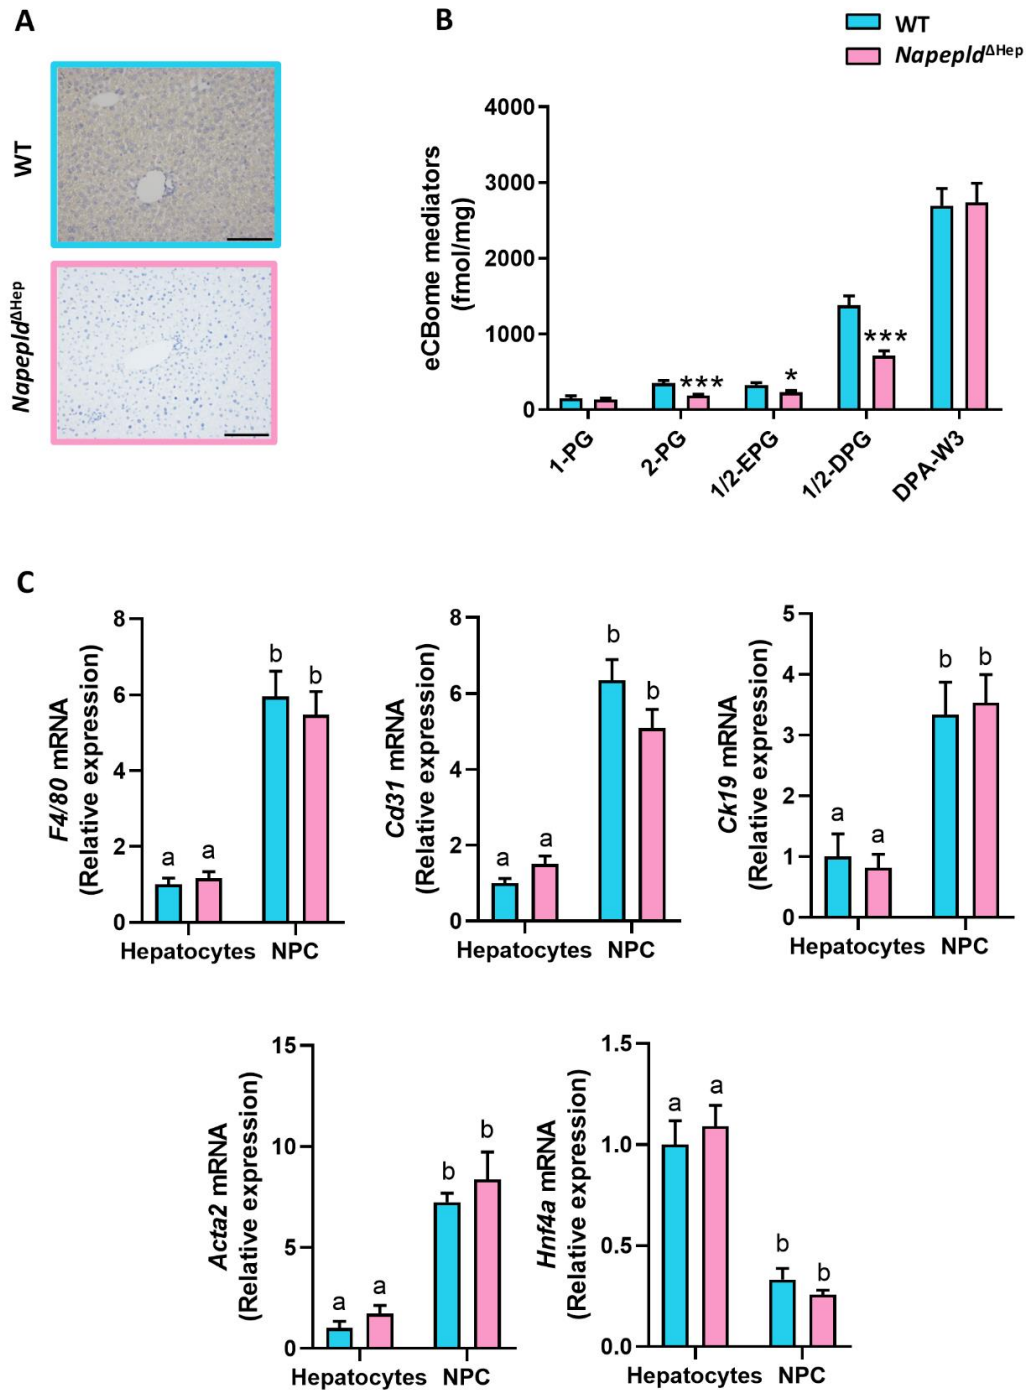

**Figure S1.** *Napepld* deletion is specific to hepatocytes. (A) Localization of *Napepld* mRNA by *in situ* hybridization in the liver (scale bar: 100  $\mu$ m;  $n = 4-5$ ). (B) eCBome mediator levels in the liver (fmol/mg) ( $n = 8-10$ ). (C) Specific markers of NPC (*F4/80*, *Cd31*, *Ck19* and *Acta2*) and hepatocytes (*Hnf4a*) measured by real-time qPCR ( $n = 4-5$ ). Blue: WT ND mice. Pink: *Napepld*<sup>ΔHep</sup> ND mice. Data are presented as the mean  $\pm$  s.e.m. \* and \*\*\* indicate a significant difference versus WT ND (Respectively  $p < 0.05$  and  $p < 0.001$ ) according to t-test. Data with different superscript letters are significantly different ( $p < 0.05$ ) according to two-way ANOVA followed by Tukey post hoc test. Lipid abbreviations: 1/2-DPG; 1/2-DPA-glycerol; 1/2-EPG, 1/2-EPA-glycerol; 1-PG, 1-palmitoylglycerol; 2-

PG, 2-palmitoylglycerol; DPA- $\omega$ 3, DPA-omega3.

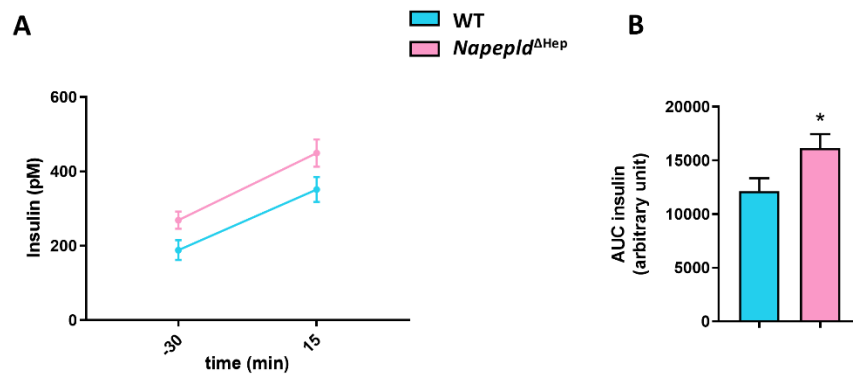

**Figure S2.** *Napepld*<sup>ΔHep</sup> mice develop a high-fat diet-like phenotype upon normal diet. (A) Plasma insulin levels (pM) at 30 min before and 15 min after oral glucose loading. (B) Mean area under the curve (AUC) of insulin measured between 30 min before and 15 min after oral glucose loading. Blue: WT ND mice. Pink: *Napepld*<sup>ΔHep</sup> ND mice ( $n = 8-10$ ). Data are presented as the mean  $\pm$  s.e.m. \* indicate a significant difference versus WT ND ( $p < 0.05$ ) according to  $t$ -test.

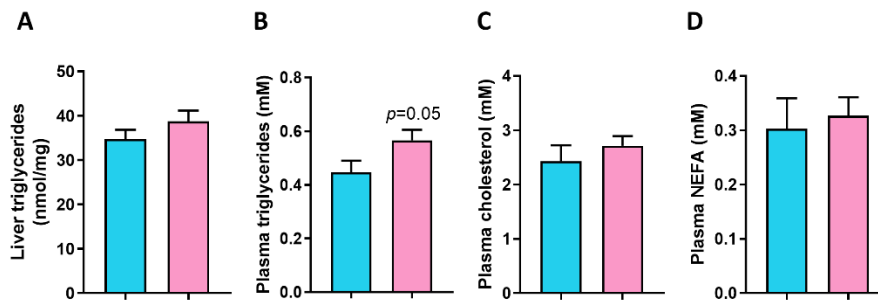

**Figure S3.** *Napepld*<sup>ΔHep</sup> mice are more sensitive to liver lipid accumulation. (A) Liver triglycerides (nmol/mg). (B) Plasma triglycerides (mM). (C) Plasma cholesterol (mM). (D) Plasma NEFA (mM). Blue: WT ND mice. Pink: *Napepld*<sup>ΔHep</sup> ND mice ( $n = 8-10$ ). Data are presented as the mean  $\pm$  s.e.m.

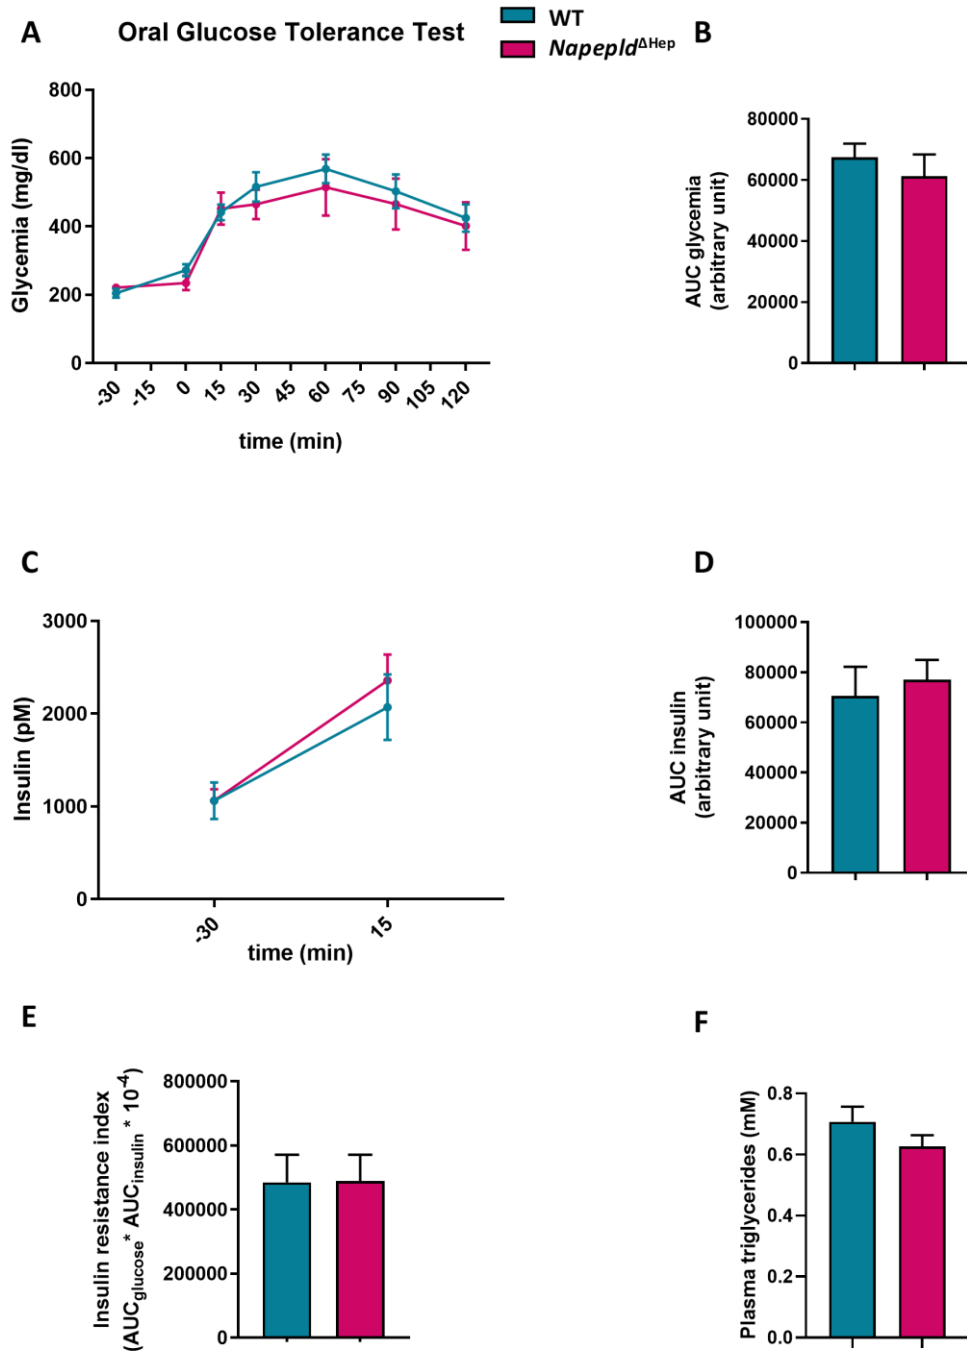

**Figure S4.** Deletion of *Napepld* partially accentuates the obese phenotype induced by a high-fat diet. (A) Plasma glucose profile (mg/dl) measured between 30 min before and 120 min after glucose loading. (B) Mean area under the curve of glycemia measured between 30 min before and 120 min after glucose loading. (C) Plasma insulin levels (pM) at 30 min before and 15 min after glucose loading. (D) Mean area under the curve (AUC) of insulin measured between 30 min before and 15 min after glucose loading. (E) Insulin resistance index determined by multiplying the AUC of blood glucose by the AUC of insulin. (F) Plasma triglyceride concentration (mM). Dark blue: WT HFD mice. Dark pink: *Napepld*<sup>ΔHep</sup> HFD mice ( $n = 11$ ). Data are presented as the mean  $\pm$  s.e.m.
